# Supplementary material
Source: PubMed Central journal article supplement (PMC2688999)
Supplement: 0903485106_0903485106SI.pdf [file 0903485106_0903485106SI.pdf]

# Supporting Information

Ristow et al. 10.1073/pnas.0903485106

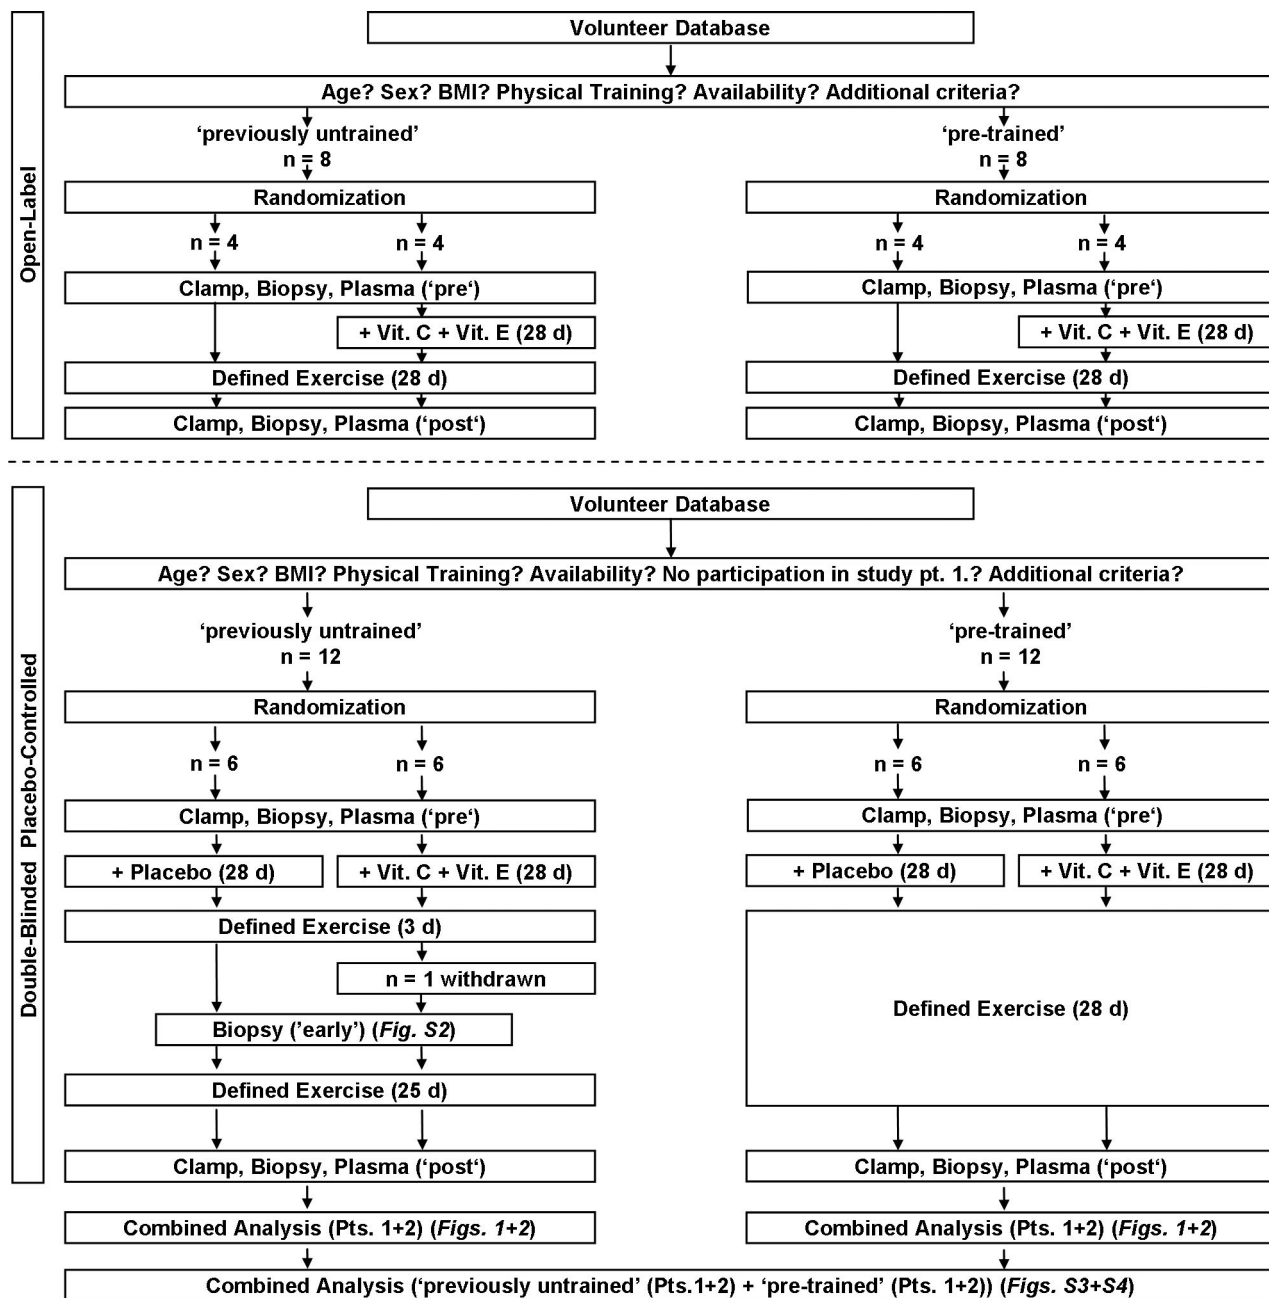

**Fig. S1.** Study design. The study consisted of 2 parts including an open-label first part (*Upper*), and double-blinded placebo-controlled second part (*Lower*), including previously untrained individuals (*Left*) and previously trained individuals (*Right*). Both groups were randomly split into antioxidant-treatment or no/placebo-treatment and analyzed after exercise intervention and collection of samples as described in *Methods* section.

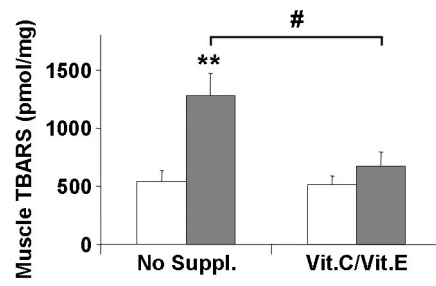

**Fig. S2.** Antioxidants prevent exercise-induced formation of oxidative stress in skeletal muscle. TBARS concentrations in skeletal muscle following a 3 day exercise intervention in the presence (*Left pair of bars*) and absence (*Right pair of bars*) of antioxidants before (white bars) and after (shaded bars) physical exercise. Bars depict means, error bars show standard error means. # indicates  $0.01 < P < 0.05$  comparing "no suppl." with "Vit.C/Vit.E" groups, \*\* indicates  $0.001 \leq P \leq 0.01$  comparing data before and after 3 days of exercise.

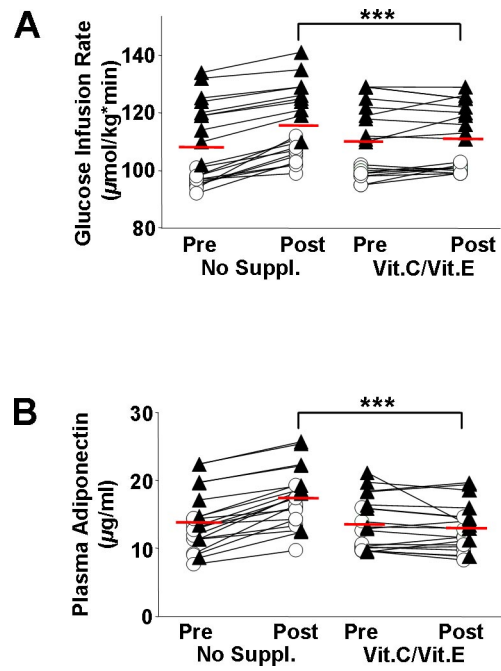

**Fig. 53.** Antioxidants prevent exercise-induced induction of insulin sensitivity (combined analysis). *A*) depicts glucose infusion rates (GIR) during euglycemic hyperinsulinemic clamps in previously untrained individuals (open circles) and pretrained individuals (black triangles) before (pre, *Left*) and after (post, *Right*) physical exercise over 4 weeks. (*Left*) Individuals not taking any medication or placebo; (*Right*) individuals taking both vitamin C (1000 mg/day) and vitamin E (400 IU/day). Horizontal red lines depict means for untrained and trained individuals together ( $n = 19$  and  $n = 20$ , respectively). Significances: \*\*\* indicates  $P < 0.001$  comparing delta values before and after 4 weeks of exercise (ANOVA). *B* depicts plasma adiponectin levels in a similar manner as *A*.

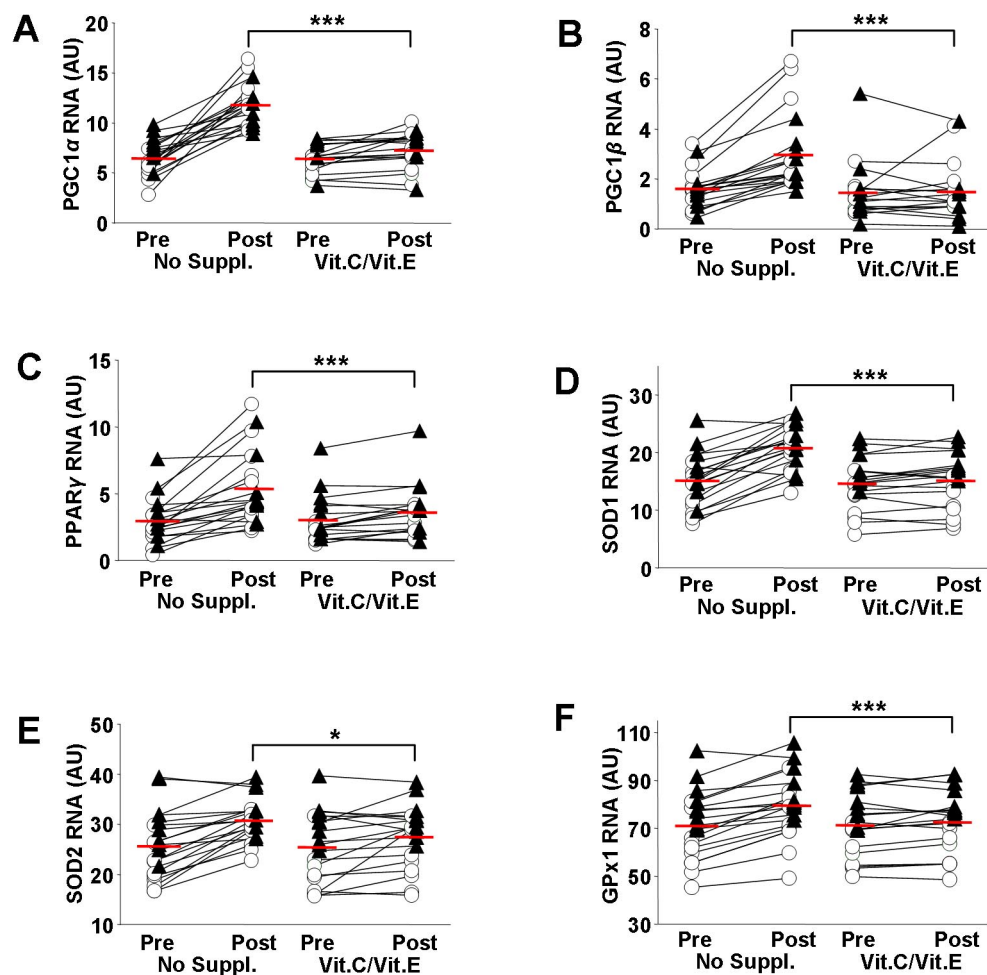

**Fig. S4.** Antioxidants prevent induction of molecular mediators of insulin sensitivity and antioxidant defense in exercised skeletal muscle (combined analysis). (A) Expression levels of *PGC1 $\alpha$*  RNA transcripts in skeletal muscle biopsies derived from previously untrained (white circles) and pre-trained (black triangles) individuals before (pre, *Left*) and after (post, *Right*) physical exercise over 4 weeks as described in the *Methods* section. (*Left*) Individuals not taking any medication or placebo; (*Right*) individuals taking both vitamin C (1000 mg/day) and vitamin E (400 IU/day). Horizontal red lines depict means for untrained and trained individuals together ( $n = 19$  and  $n = 20$ , respectively). (B) expression levels of *PGC1 $\beta$*  RNA transcripts; (C) expression levels of *PPAR $\gamma$*  RNA; (D) levels of superoxide dismutase 1 (*SOD1*) transcripts; (E) RNA levels of superoxide dismutase 2 (*SOD2*); (F) glutathione peroxidase 1 (*GPx1*) RNA expression levels, all in a similar fashion as in (A). Significances: \* indicates  $0.01 < P < 0.05$  comparing delta values before and after 4 weeks of exercise (ANOVA), \*\*\* indicates  $P < 0.001$  (ANOVA).
